# Supplementary material for: Sub-seasonal variability and multi-year trends in glacier area change and ice speed on the Antarctic Peninsula
Source: Copernicus journal article supplement (doi:10.5194/egusphere-2025-5492), 2025-12-15
Supplement: Supplementary file 1 [file supplements.xlsx]

## Sheet: Tabelle1
glacier_name	location	square_no	square_loc	rel. terminus change (2013-2023)	terminus change category	STL strength terminus	mean velo (2014 - 2024)	rel. velo change (2015-2023)	percentage velocity change (2015-2023)	velo change category	max xcorr	lag	leading	significance	STL strength velo
Akaga-Sinion	east	1	grounded	-13.5655	change point	0.2035	156.7	62.4	37.49	negative change	-0.33	5	area	yes	0.771416
		2	floating				309.6				0.41	12	area	yes	0.707495
Aysuk	west	1	grounded				693.24	61.82	8.96	positive	-0.5	-17	velo	yes	0.750131
Birley	west	1	grounded				1011.19	119.68	13.07	positive	-0.52	-18	velo	yes	0.932738
Bleriot	west	1	grounded	-0.051	positive	0.597	173.06	0.33	0.19	positive	-0.41	-9	velo	yes	0.605757
		2	grounded				508.5	39.14	7.79		0.33	-6	velo	yes	0.634348
		3	grounded				978.11	68.73	6.97		0.35	7	area	yes	0.75518
Boydell	east	1	grounded	-0.0945	negative	0.4294	97.17	-52.29	-42.36	negative	0.37	-2	velo	yes	0.626837
Cadman	west	1	floating	-10.5495	change point	0.2082	1484.49				0.61	-6	velo	yes	0.389275
		2	grounded				2056.36	357.69	20.25	positive	0.45	22	area	no	0.569517
Carlson	west	1	grounded	-3.8095	negative	0.3086	588.16	72.15	12.54	positive	0.29	1	area	yes	0.784737
		2	floating				1204.56				0.31	0	NA	yes	0.40484
Cayley	west	1	grounded	0.4445	positive	0.4883	1743.11	108.49	6.28	positive	0.4	-22	velo	yes	0.419347
Clarke	west	1	grounded	-1.118	negative	0.5212	592.82	7.05	1.2	fluctuating	-0.42	21	area	yes	0.652302
Crane	east	1	grounded	-5.158	change point	0.2306	668.9	287.66	39.23	negative change	-0.59	12	area	yes	0.439787
		2	floating				976.47				-0.52	14	area	yes	0.731926
		3	floating				1249.14				-0.47	8	area	yes	0.652419
Darvari-Boryana-Desudava	east	1	grounded	-0.174	negative	0.4258	126.76	-38.73	-25.91	negative	0.33	-23	velo	no	0.826538
Dinsmore-Bombardier-Edgeworth	east	1	grounded	-32.661	change point	0.7851	167.54	46.93	26	negative change	-0.55	2	area	yes	0.574139
		2	grounded				223.37	51.05	22.2		-0.45	1	area	yes	0.703852
		3	grounded				129.44	8.56	5.93		-0.44	20	area	yes	0.739514
		4	floating				220.45	189.47	85.98		-0.44	-15	velo	yes	0.803747
		5	floating				378.11				-0.66	0	NA	yes	0.778025
		6	floating				200.77				-0.59	-10	velo	yes	0.725088
Drummond	west	1	grounded	-0.0975	positive	0.3479	1351.05	242.48	21.01	positive	-0.31	-4	velo	yes	0.651521
Drygalski	east	1	grounded	-4.688	negative	0.549	1129.95	-103.15	-8.89	negative	-0.51	0	NA	yes	0.59432
Erskine	west	1	grounded	-1.103	negative	0.589	1178.05	91.48	8.15	positive	0.41	15	area	yes	0.721656
Fleming	west	1	grounded	5.715	fluctuating	0.4836	1753.52	14.39	0.82	fluctuating	0.42	13	area	yes	0.608944
		2	floating				2453.01	-55.54	-2.2		-0.28	-3	velo	yes	0.398063
Funk	west	1	grounded	0.149	positive	0.3051	691.74	20.04	2.94	positive	-0.41	4	area	yes	0.759134
		2	grounded				1043.39	3.58	0.34	fluctuating	-0.41	-16	velo	yes	0.547623
Heim	west	1	grounded	-2.866	negative	0.5647	387.67	35.18	9.91	positive	0.42	-2	velo	yes	0.699964
Hektoria-Green-Evans	east	1	grounded				565.17	554.19	84.57	negative change	-0.8	8	area	yes	0.373126
		2	grounded				320.07	269.76	74.23		-0.76	9	area	yes	0.312882
		3	floating				423				-0.66	8	area	yes	0.534587
		4	floating				909.24				-0.7	12	area	yes	0.754982
Hopkins	west	1	grounded	-0.288	negative	0.3093	547.78	87.47	16.79	positive	-0.42	18	area	yes	0.835285
Hugi	west	1	grounded	-0.969	negative	0.5958	1503.8	175.66	12.16	positive	0.38	-24	velo	no	0.802918
Jorum	east	1	grounded	-1.042	change point	0.5395	375.07	-3.02	-0.77	negative change	-0.3	-3	velo	yes	0.595805
		2	floating				485.15				-0.58	15	area	yes	0.494104
Keith	west	1	grounded	-0.8315	negative	0.6168	1130.78	312.59	29.43	positive	-0.37	10	area	yes	0.758976
Malorad	west	1	grounded	-0.872	negative	0.8613	460.48	26.52	5.97	positive	-0.64	22	area	yes	0.84006
McCane	west	1	grounded	0.122	negative	0.2426	1036.69	112.82	11.18	positive	-0.29	-4	velo	no	0.887488
Otlet	west	1	grounded	-1.912	negative	0.5672	494.91	171.85	38.49	positive	-0.37	18	area	no	0.576886
Peter	west	1	grounded	0.1855	fluctuating	0.5362	616.04	99.91	16.73	positive	0.5	14	area	yes	0.741304
Prospect	west	1	grounded	-33.704	negative	0.3184	1120.69	45.16	4.09	positive	0.38	23	area	yes	0.582391
		2	grounded				809.94	400.74	64.18		0.39	-18	velo	yes	0.540105
		3	grounded				1008.18	94.37	9.65		-0.56	-6	velo	yes	0.620381
		4	floating				1844.89				-0.36	8	area	yes	0.641975
		5	floating				1387.84				0.57	19	area	yes	0.445417
Punchbowl	east	1	grounded	-2.307	change point	0.403	99.84	-16.06	-12.77	negative change	-0.52	-16	velo	yes	0.75129
Pyke	east	1	grounded	-0.8365	negative	0.4105	252.92	-13.1	-5.12	negative	0.34	24	area	yes	0.840937
		2	grounded				282.11	-37.34	-12.63		-0.46	-16	velo	yes	0.825469
Remus-Snowshoe	west	1	grounded	0.2095	fluctuating	0.5663	517.6	-13.22	-2.58	negative	-0.26	-22	velo	no	0.406484
Renard-Krebs	west	1	grounded	-1.893	negative	0.471	764.91	77	9.76	positive	-0.31	-17	velo	no	0.344435
		2	grounded				514.97	166.59	33.84		0.31	-14	velo	no	0.584704
		3	grounded				463.19	56.98	12.46		-0.41	-6	velo	yes	0.527095
Sjogren	east	1	grounded	-3.6105	change point	0.4781	284.63	91.62	34.29	positive	-0.41	2	area	yes	0.660207
		2	floating				420.44				0.47	23	area	yes	0.755738
Stringfellow	west	1	grounded	0.011	negative	0.693	1341.06	49.79	3.8	fluctuating	0.45	5	area	yes	0.789655
Swithinbank	west	1	grounded	-0.298	negative	0.7377	400.36	-13.82	-3.36	fluctuating	-0.35	21	area	no	0.478657
Temple	west	1	grounded	-0.0235	fluctuating	0.6399	642.68	19.48	3.02	fluctuating	-0.43	19	area	yes	0.581186
Trooz	west	1	grounded	0.027	negative	0.672	1453.25	199.06	15	positive	0.43	-16	velo	yes	0.93081
Valot	west	1	grounded	-4.189	negative	0.6084	510.46	172.49	40.4	positive	0.62	-10	velo	yes	0.789462
Widdowson	west	1	grounded	0.0615	fluctuating	0.2642	976.64	91.35	10.27	positive	-0.33	23	area	no	0.703934
Wilkinson	west	1	grounded	-5.1635	change point	0.565	1503.29	388.18	27.08	positive	0.28	-5	velo	no	0.604231
Zaychar	east	1	grounded	-1.327	change point	0.1977	76.01	-34.04	-37.18	negative	0.38	-2	velo	yes	0.502443
